# Supplementary material for: Evidence for the binding mode of porphyrins to G-quadruplex DNA
Source: Royal Society of Chemistry journal article supplement (doi:10.1039/b901027k), 2009-01-01
Supplement: b901027k.pdf [file b901027k.pdf]

# Supporting information

for

## Evidence for the binding mode of porphyrins to G-quadruplex DNA

Chunying Wei, Guoqing Jia, Jun Zhou, Gaoyi Han, and Can Li

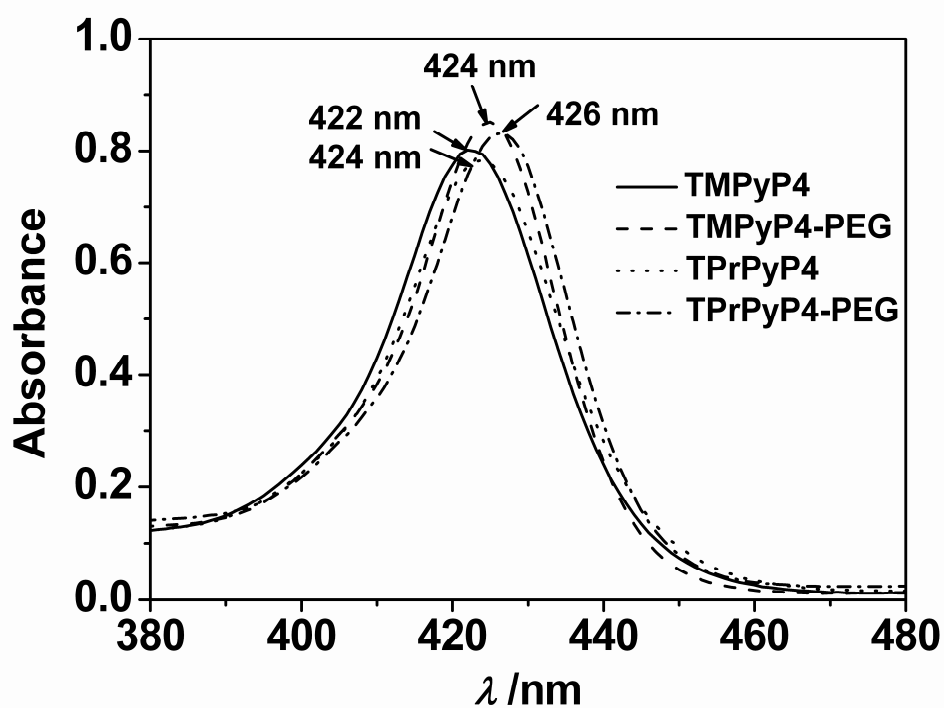

**Fig. S1:** Absorption spectra of 3.5  $\mu$ M TMPyP4 and TPrPyP4 in buffer containing 10 mM Tris-HCl (pH 7.5), 150 mM KCl, and 1mM EDTA in the absence and presence of 40% PEG.

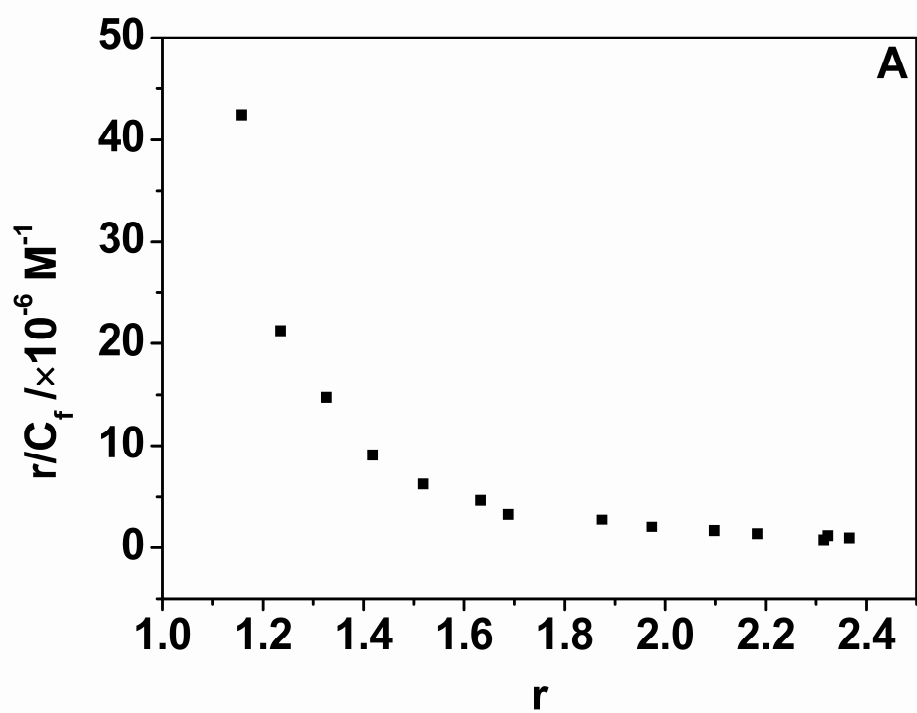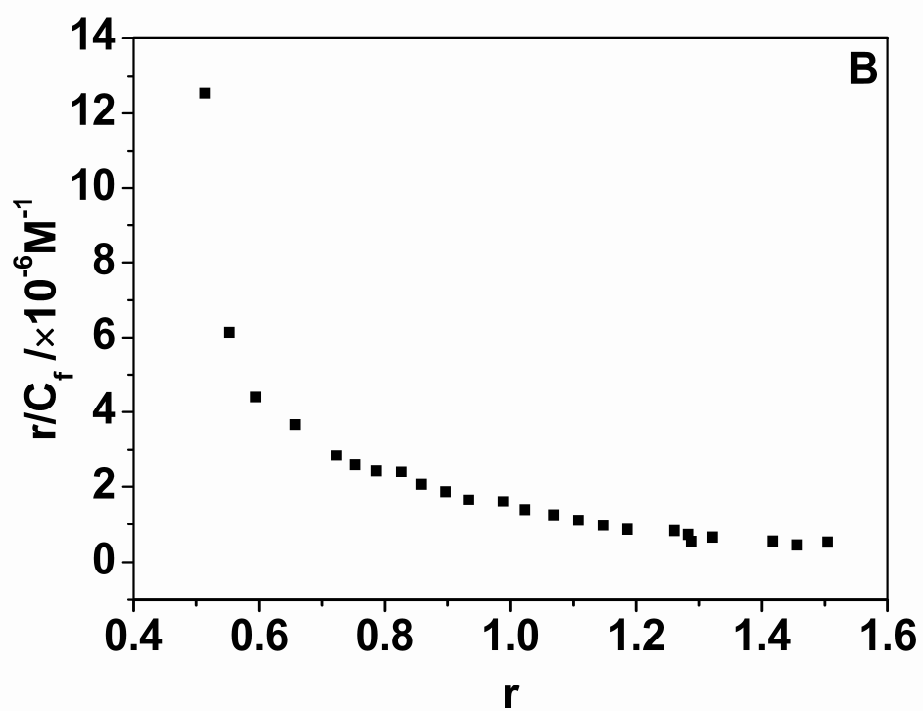

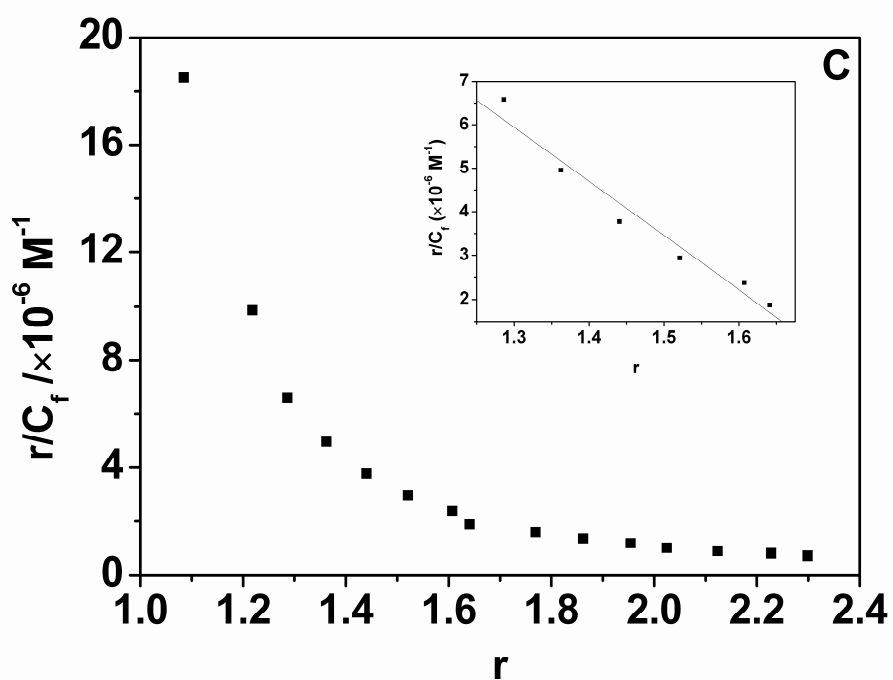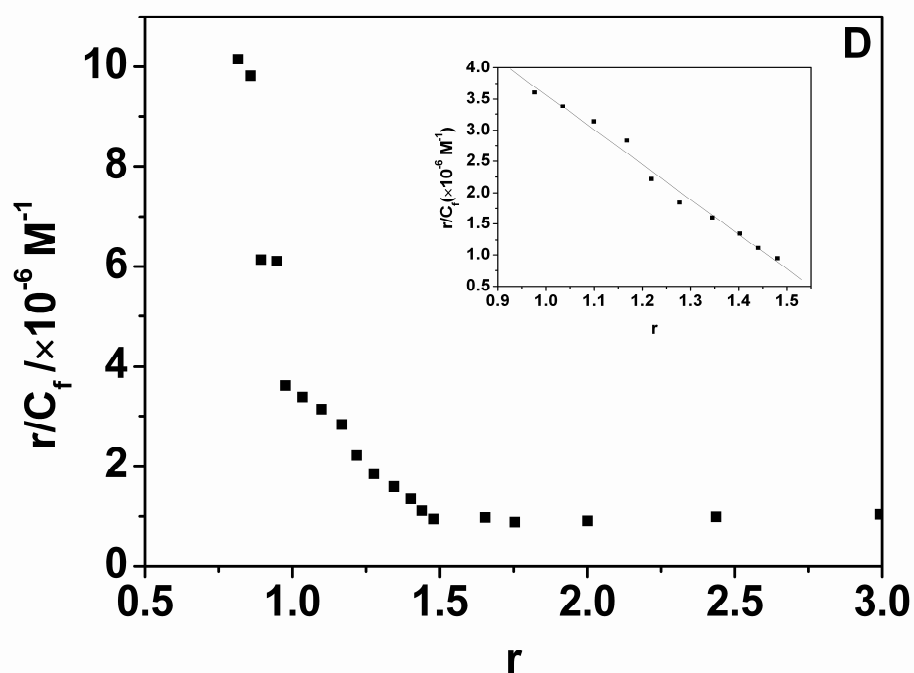

**Fig. S2.** Scatchard plots for TMPyP4 (A, B) and TPrPyP4 (C, D) with  $\text{AG}_3(\text{T}_2\text{AG}_3)_3$  G-quadruplex in buffer containing 10 mM Tris-HCl (pH 7.5), 150 mM KCl, and 1mM EDTA in the absence (A, C) and presence (B, D) of 40% PEG.

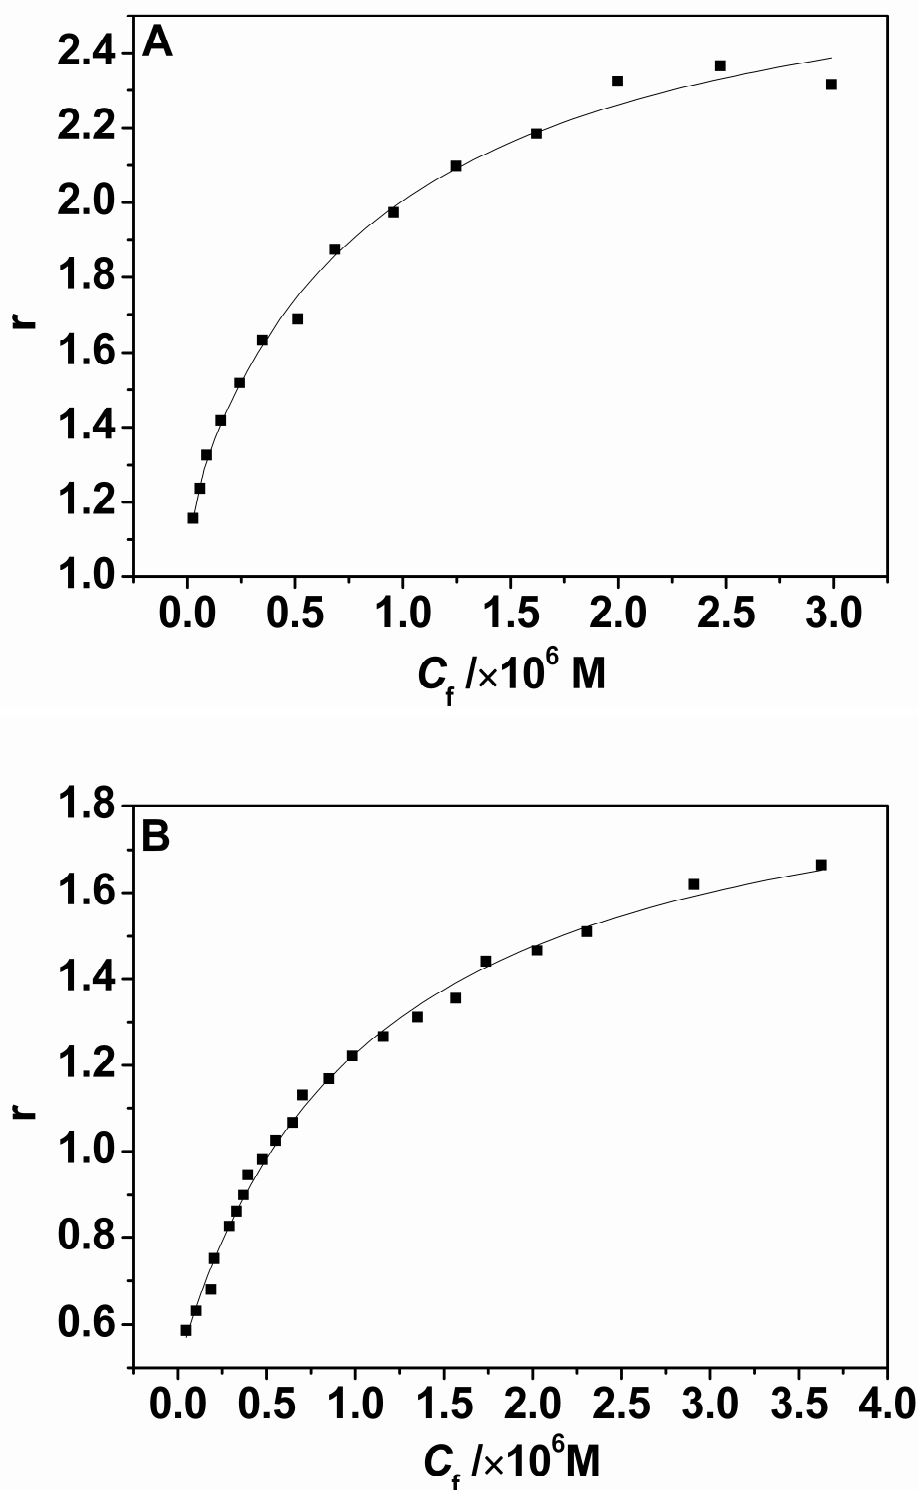

**Fig. S3:** Plots of  $r$  (moles of bound TMPyP4/1 mol of G-quadruplexes) versus  $[\text{TMPyP4}]_{\text{free}}$  in buffer containing 10 mM Tris-HCl (pH 7.5), 150 mM KCl, and 1mM EDTA in the absence (A) and presence (B) of 40% PEG.
